# Supplementary material
Source: PubMed Central journal article supplement (PMC3984390)
Supplement: NIHMS569388-supplement-1.pdf [file NIHMS569388-supplement-1.pdf]

**a**

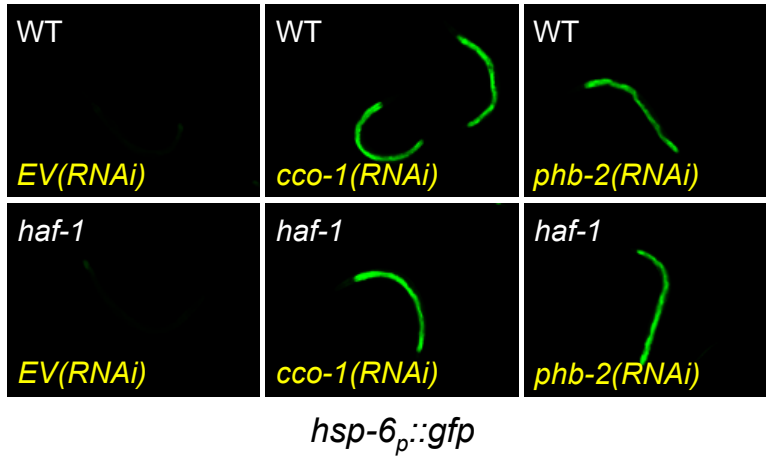

**Supplementary Figure 1. HAF-1 is not required for UPR<sup>mt</sup> induction caused by *cco-1* and *phb-2* RNAi.** *hsp-6<sub>p</sub>::gfp* induction was measured 3 days from hatch at 20°C in wild-type and *haf-1(ok705)* animals.

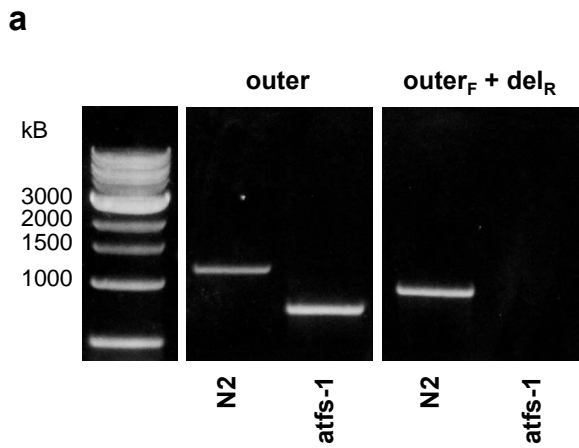

**Supplementary Figure 2. Genotyping of *atfs-1(tm4525)* mutant.** Outer primers, which bind outside the deletion, give a WT band of ~1200 bp and a *tm4525* band of ~800. The del<sub>R</sub> primer is inside the *tm4525* deletion. The outer<sub>F</sub> and del<sub>R</sub> give a WT band of ~1000 bp and no *tm4525* band.

**a**

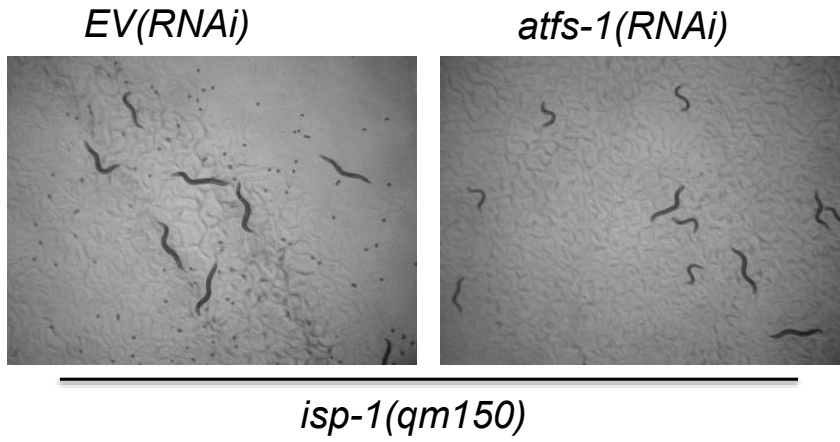

**Supplementary Figure 3. The developmental rate of *isp-1(qm150)* is delayed by *atfs-1(RNAi)*.** (A) *isp-1(qm150)* were grown from egg on *EV(RNAi)* and *atfs-1(RNAi)* for 6 days.

**Supplementary Table 1. Validated RNAi Inducers of the UPR<sup>mt</sup>.**

| Gene Name         | NCBI KOG Annotation                                                             | PPOD (Human   Yeast Orthologue)       | Mito. Targeted | Extended Lifespan | Reported UPR <sup>mt</sup> inducer |
|-------------------|---------------------------------------------------------------------------------|---------------------------------------|----------------|-------------------|------------------------------------|
| <i>E04A4.5</i>    | Mitochondrial import inner membrane translocase, subunit TIM17                  | TIM17A/TIM17 B   TIM17                | A, B, D        |                   |                                    |
| <i>F15D3.7</i>    | Mitochondrial import inner membrane translocase, subunit TIM23                  | TIMM23B   TIM23                       | A, B, D        |                   | G, H                               |
| <i>T09B4.9</i>    | Mitochondrial import inner membrane translocase, subunit TIM44                  | TIM44   TIM44                         | A, B, C, D     |                   | F                                  |
| <i>W02F12.5</i>   | Dihydrolipoamide succinyltransferase (2-oxoglutarate dehydrogenase, E2 subunit) | DLTS   KGD2                           | B, C, D        |                   | H                                  |
| <i>dnj-21</i>     | Molecular chaperone (DnaJ superfamily)                                          | TIM14;DNAJC1 5; DNAJC19   TIM14/PAM18 | A, B, D        |                   | F                                  |
| <i>lpd-9</i>      |                                                                                 |                                       | C, D           |                   |                                    |
| <i>phb-2</i>      |                                                                                 | PHB2   PHB2                           | A, B, D        |                   | F                                  |
| <i>C04C3.3</i>    | Pyruvate dehydrogenase E1, beta subunit                                         | PDHB   PDB1                           | A, B, C, D     |                   |                                    |
| <i>wah-1</i>      | Programmed cell death 8 (apoptosis-inducing factor)                             | AIFM1                                 | A, B, C, D     |                   |                                    |
| <i>F45G2.8</i>    | Uncharacterized conserved protein                                               | PAM16   PAM16                         | A, B, D        |                   |                                    |
| <i>Y54G9A.7</i>   |                                                                                 |                                       | C, D           |                   |                                    |
| <i>ech-6</i>      | Enoyl-CoA hydratase                                                             | ECHS1                                 | A, B, C, D     |                   |                                    |
| <i>Y110A7A.19</i> | Uncharacterized conserved protein                                               | PTCD3                                 | B, C, D        |                   |                                    |
| <i>sco-1</i>      | Putative cytochrome C oxidase assembly protein                                  | SCO1   SCO1; SCO2                     | B, D           | E                 |                                    |
| <i>cchl-1</i>     | Holocytochrome c synthase/heme-lyase                                            | CCHL   CYC3                           | A, B, D        | WBRNAi 00063981   | I                                  |
| <i>ril-1</i>      |                                                                                 |                                       | D              | WBRNAi 00063960   | I                                  |
| <i>tomm-22</i>    | Translocase of outer mitochondrial membrane complex, subunit TOM22              | TOM22                                 | B, D           |                   |                                    |
| <i>Y22D7AL.10</i> | Mitochondrial chaperonin                                                        | HSPE1   HSP10                         | B, C, D        |                   |                                    |
| <i>Y17G9B.5</i>   | Intermediate in Toll signal transduction pathway (ECSIT)                        | ECSIT                                 | B, C, D        |                   |                                    |
| <i>his-5</i>      | Histone H4                                                                      | Histone H4   HHF2                     | C              |                   |                                    |
| <i>letm-1</i>     | Ca <sup>2+</sup> -binding transmembrane protein LETM1/MRS7                      | LETM1   MDM38                         | B, C           |                   |                                    |
| <i>C08F8.2</i>    | Mitochondrial RNA helicase SUV3, DEAD-box superfamily                           | SUPV3L1   SUV3                        | A, B, C        |                   |                                    |

|                   |                                                                   |                                     |         |                   |
|-------------------|-------------------------------------------------------------------|-------------------------------------|---------|-------------------|
| <i>F02A9.4</i>    | 3-Methylcrotonyl-CoA carboxylase                                  | MCCC2                               | A, B, C |                   |
| <i>hsp-60</i>     | Mitochondrial chaperonin, Cpn60/Hsp60p                            | HSPD1   HSP60                       | A, B, C | F, H              |
| <i>Y38E10A.24</i> |                                                                   |                                     |         |                   |
| <i>tkt-1</i>      | Transketolase                                                     | TKTL1; TKTL2   TKL1; TKL2           |         | WBRNAi 00078549 H |
| <i>ant-1.1</i>    | Mitochondrial ADP/ATP carrier proteins                            | ANT1; ANT2; ANT3   AAC1; AAC2; AAC3 | A, B    | WBRNAi 00078570   |
| <i>drp-1</i>      | Vacuolar sorting protein VPS1, dynamin, and related proteins      | DRP1   DNM1                         | A, B    |                   |
| <i>Y52B11C.1</i>  |                                                                   |                                     |         |                   |
| <i>F15D3.6</i>    | Predicted member of the intramitochondrial sorting protein family | SLMO2   UPS2; UPS3                  | B       |                   |
| <i>Y24D9A.8</i>   | Transaldolase                                                     | TALDO1   TAL1                       |         |                   |
| <i>W02B12.9</i>   | Mitochondrial carrier protein MRS3/4                              | MFRN   MRS3; MRS4                   | A, B    |                   |
| <i>AC8.6</i>      |                                                                   |                                     |         |                   |
| <i>F21C3.10</i>   |                                                                   |                                     |         |                   |

RNAi knockdown of the following 34 genes significantly induced the *hsp-6p::gfp* reporter. The eukaryotic orthologous groups (KOGs) annotation and PPOD derived human and yeast orthologues for each gene are shown. Annotation for mitochondrial targeting is based off of Go Term “Mitochondrion” annotation (A), orthology to a known mitochondrial genes by PPOD (B), MitoProt II probability estimation >0.8 (C), or presence in a published *C. elegans* mitochondrial proteome data set by Li, J., et al., Proteomics, 2009 <sup>1</sup> (D). Reported effects on longevity are shown as WBRNAi experiments or Chen, D., et al., Aging Cell, 2007 <sup>2</sup> (E). Reported effects on the UPR<sup>mt</sup> are based on the work of Yoneda, T., et al., Journal of Cell Science, 2004 <sup>3</sup> (F), and Nargund, A., et al., Science, 2012 <sup>4</sup> (G). Melo, J., et al., Cell, 2012 <sup>5</sup> (H). Shore, D., et al., PLoS Genet, 2012 <sup>6</sup> (I).

**Supplementary Table 2. Non-Validated RNAi Inducers of the UPR<sup>mt</sup>.**

| Gene Name       | NCBI KOG Annotation                                                                            | Putative Mito. Function | Mito. Targeted | Extended Lifespan | Reported UPR <sup>mt</sup> inducer |
|-----------------|------------------------------------------------------------------------------------------------|-------------------------|----------------|-------------------|------------------------------------|
| <i>F44G4.2</i>  | Unnamed protein                                                                                | Complex I               | ✓              |                   |                                    |
| <i>B0491.5</i>  |                                                                                                | Complex I               | ✓              | C                 |                                    |
| <i>nuo-1</i>    | NADH:ubiquinone oxidoreductase, NDUFV1/51kDa subunit                                           | Complex I               | ✓              | WBRNAi 00066177   | G                                  |
| <i>nduf-2.2</i> | NADH:ubiquinone oxidoreductase, NDUFS2/49 kDa subunit                                          | Complex I               | ✓              | WBRNAi 00078565   |                                    |
| <i>ZK809.3</i>  | NADH:ubiquinone oxidoreductase, NDUFB6/B17 subunit                                             | Complex I               | ✓              | WBRNAi 00078577   |                                    |
| <i>F31D4.9</i>  |                                                                                                | Complex I               |                |                   |                                    |
| <i>gas-1</i>    | NADH:ubiquinone oxidoreductase, NDUFS2/49 kDa subunit                                          | Complex I               | ✓              |                   |                                    |
| <i>nduf-7</i>   | NADH-ubiquinone oxidoreductase, NUF57/PSST/20 kDa subunit                                      | Complex I               | ✓              |                   |                                    |
| <i>C16A3.5</i>  | NADH:ubiquinone oxidoreductase, NDUFB9/B22 subunit                                             | Complex I               | ✓              |                   |                                    |
| <i>nduf-5</i>   | NADH:ubiquinone oxidoreductase, NDUFS5/15kDa                                                   | Complex I               | ✓              |                   |                                    |
| <i>D2030.4</i>  | NADH:ubiquinone oxidoreductase, NDUFB7/B18 subunit                                             | Complex I               | ✓              | WBRNAi 00065275   | D, E, G                            |
| <i>F59C6.5</i>  | NADH-ubiquinone oxidoreductase, subunit NDUFB10/PDSW                                           | Complex I               | ✓              | WBRNAi 00066189   | D, G                               |
| <i>T20H4.5</i>  | NADH:ubiquinone oxidoreductase, NDUFS8/23 kDa subunit                                          | Complex I               | ✓              | WBRNAi 00065279   | E, G                               |
| <i>nduf-6</i>   | NADH:ubiquinone oxidoreductase, NDUFS6/13 kDa subunit                                          | Complex I               | ✓              |                   | D                                  |
| <i>Y51H1A.3</i> | NADH:ubiquinone oxidoreductase, NDUFB8/ASHI subunit                                            | Complex I               |                |                   |                                    |
| <i>F42G8.10</i> | Uncharacterized conserved protein                                                              | Complex I               |                |                   |                                    |
| <i>nuo-4</i>    | NADH:ubiquinone oxidoreductase, NDUFA10/42kDa subunit                                          | Complex I               |                | WBRNAi 00065278   | E, G                               |
| <i>ucr-1</i>    | Mitochondrial processing peptidase, beta subunit, and related enzymes (insulinase superfamily) | Complex III             | ✓              | WBRNAi 00078564   |                                    |

|                 |                                                                  |                           |   |                    |         |
|-----------------|------------------------------------------------------------------|---------------------------|---|--------------------|---------|
| <i>T02H6.11</i> | Ubiquinol cytochrome c reductase, subunit QCR7                   | Complex III               | ✓ | B                  |         |
| <i>F45H10.2</i> | Ubiquinol cytochrome c reductase, subunit QCR8                   | Complex III               | ✓ |                    |         |
| <i>R07E4.3</i>  | Ubiquinol cytochrome c reductase, subunit QCR8                   | Complex III               | ✓ |                    |         |
| <i>F29B9.11</i> |                                                                  | Complex IV                | ✓ |                    |         |
| <i>cco-2</i>    | Cytochrome c oxidase, subunit Va/COX6                            | Complex IV                | ✓ | WBRNAi<br>00063991 | G       |
| <i>F29C4.2</i>  | Unnamed protein                                                  | Complex IV                | ✓ | WBRNAi<br>00078571 |         |
| <i>cco-1</i>    | Cytochrome c oxidase, subunit Vb/COX4                            | Complex IV                | ✓ | WBRNAi<br>00063967 | D, E, F |
| <i>F26E4.6</i>  | Cytochrome c oxidase, subunit VIIc/COX8                          | Complex IV                | ✓ | WBRNAi<br>00065276 | D, E, G |
| <i>atp-2</i>    | F0F1-type ATP synthase, beta subunit                             | Complex V                 | ✓ | WBRNAi<br>00066144 | F, G    |
| <i>atp-4</i>    | Mitochondrial F1F0-ATP synthase, subunit Cf6 (coupling factor 6) | Complex V                 | ✓ | WBRNAi<br>00063979 | G       |
| <i>R53.4</i>    | Mitochondrial F1F0-ATP synthase, subunit f                       | Complex V                 | ✓ | C                  |         |
| <i>F32D1.2</i>  | Mitochondrial F1F0-ATP synthase, subunit epsilon/ATP15           | Complex V                 | ✓ |                    |         |
| <i>F58F12.1</i> | Mitochondrial F1F0-ATP synthase, subunit delta/ATP16             | Complex V                 | ✓ |                    |         |
| H28O16.1        | F0F1-type ATP synthase, alpha subunit                            | Complex V                 |   | WBRNAi<br>00066165 | D, F, G |
| <i>atp-3</i>    | Mitochondrial F1F0-ATP synthase, subunit OSCP/ATP5               | Complex V                 |   | WBRNAi<br>00063970 | G       |
| <i>R04F11.2</i> | Mitochondrial F1F0-ATP synthase, subunit e                       | Complex V                 | ✓ |                    |         |
| <i>asg-2</i>    | Mitochondrial F1F0-ATP synthase, subunit g/ATP20                 | Complex V                 | ✓ | WBRNAi<br>00065274 | E, G    |
| <i>asg-1</i>    | Mitochondrial F1F0-ATP synthase, subunit g/ATP20                 | Complex V                 | ✓ |                    | D       |
| T26E3.7         | F0F1-type ATP synthase, alpha subunit                            | Complex V                 |   |                    |         |
| Y82E9BR.3       | Mitochondrial F1F0-ATP synthase, subunit c/ATP9/proteolipid      | Complex V                 |   |                    |         |
| <i>cyc-2.1</i>  | Cytochrome c                                                     | Cytochrome C              | ✓ | WBRNAi<br>00078573 |         |
| <i>F33D4.5</i>  | 50S ribosomal protein L1                                         | Mitochondrial Translation | ✓ | WBRNAi<br>00078562 | A       |
| <i>C30C11.1</i> | Mitochondrial ribosomal protein L32                              | Mitochondrial Translation | ✓ |                    |         |
| <i>F09G8.3</i>  | Mitochondrial/chloroplast ribosomal protein S9                   | Mitochondrial Translation | ✓ | WBRNAi<br>00078568 |         |
| <i>F59A3.3</i>  | Mitochondrial/chloroplast ribosomal protein L24                  | Mitochondrial Translation | ✓ | C                  |         |
| <i>K01C8.6</i>  | Mitochondrial ribosomal protein L10                              | Mitochondrial Translation | ✓ | C                  |         |

|                  |                                                                            |                           |   |                    |      |
|------------------|----------------------------------------------------------------------------|---------------------------|---|--------------------|------|
| <i>tag-264</i>   | Mitochondrial 28S ribosomal protein S30                                    | Mitochondrial Translation | ✓ | C                  | D, A |
| <i>tufm-1</i>    | Mitochondrial translation elongation factor Tu                             | Mitochondrial Translation | ✓ | WBRNAi<br>00078595 |      |
| <i>T04A8.11</i>  |                                                                            | Mitochondrial Translation | ✓ |                    |      |
| <i>dap-3</i>     | Mitochondrial ribosome small subunit component, mediator of apoptosis DAP3 | Mitochondrial Translation | ✓ |                    |      |
| F45E12.5         | Mitochondrial ribosomal protein L14                                        | Mitochondrial Translation |   |                    |      |
| <i>mrpl-37</i>   |                                                                            | Mitochondrial Translation | ✓ | A                  | A    |
| <i>mrps-5</i>    | Ribosomal protein S5                                                       | Mitochondrial Translation | ✓ | A                  | A    |
| <i>F56B3.8</i>   | Mitochondrial/chloroplast ribosomal protein L2                             | Mitochondrial Translation | ✓ | A                  | A    |
| <i>sars-2</i>    | Seryl-tRNA synthetase                                                      | Mitochondrial Translation | ✓ |                    |      |
| <i>T13H5.5</i>   | Mitochondrial ribosomal protein S18b                                       | Mitochondrial Translation | ✓ |                    |      |
| <i>T23B12.2</i>  | Mitochondrial/chloroplast ribosomal protein L4                             | Mitochondrial Translation | ✓ |                    |      |
| <i>T23B12.3</i>  | Mitochondrial/chloroplast ribosomal protein S2                             | Mitochondrial Translation | ✓ |                    |      |
| <i>W04B5.4</i>   | Mitochondrial ribosomal protein L30                                        | Mitochondrial Translation | ✓ |                    |      |
| <i>Y39A1A.6</i>  | Mitochondrial/chloroplast ribosomal protein L22                            | Mitochondrial Translation | ✓ |                    |      |
| <i>Y39B6A.39</i> | Mitochondrial ribosomal protein S28                                        | Mitochondrial Translation | ✓ |                    |      |
| <i>Y48C3A.10</i> | Mitochondrial/chloroplast ribosomal protein L20                            | Mitochondrial Translation | ✓ |                    |      |
| <i>Y34D9A.1</i>  | Phosphatidylethanolamine binding protein                                   | Mitochondrial Translation | ✓ |                    |      |

This table represents 61 positive inducers of *hsp-6p::gfp* identified in our screen that target components of the electron transport chain or mitochondrial translation machinery.

Since similar hits have been reported to induce the UPR<sup>mt</sup>, we focused our validation elsewhere, but this list is expected to represent genuine inducers of the UPR<sup>mt</sup> and in some cases, have been validated by other groups. Putative Mitochondrial Function is based off KOG annotation, PPOD orthology analysis, or blastP homology analysis.

Mitochondrial targeting is based of inclusion in the *C. elegans* mitochondrial proteome data set by Li, J., et al., Proteomics, 2009<sup>1</sup>. Reported effects on longevity or UPR<sup>mt</sup>



induction are shown as WBRNAi experiments or Houtkooper, R., et al., Nature, 2013<sup>7</sup> (A), Lee, S.S., et al., Nature Gen, 2003<sup>8</sup> (B), Chen, D., et al., Aging Cell, 2007<sup>2</sup> (C), Yoneda, T., et al., Journal of Cell Science, 2004<sup>3</sup> (D), Hamilton, B., et al., Genes Dev, 2005<sup>9</sup> (E), Melo, J., et al., Cell, 2012<sup>5</sup> (F), and Shore, D., et al., PLoS Genet, 2012<sup>6</sup> (G).

**Supplementary Table 3. Effects of 34 Validated RNAi inducers of the UPR<sup>mt</sup> on other stress response reporters.**

| RNAi/cond.              | <i>hsp-6<sub>p</sub>::gfp</i> | <i>hsp-60<sub>p</sub>::gfp</i> | <i>hsp-4<sub>p</sub>::gfp</i> | <i>hsp-16.2<sub>p</sub>::gfp</i> |
|-------------------------|-------------------------------|--------------------------------|-------------------------------|----------------------------------|
| <i>EV</i>               | 1 ± 0.02                      | 1 ± 0.02                       | 1 ± 0.04                      | 1 ± 0.03                         |
| <i>phb-2</i>            | 12.29 ± 0.52                  | 1.88 ± 0.07                    | 1.23 ± 0.05                   | 0.82 ± 0.07                      |
| <i>EV + Heat Shock</i>  | #N/A                          | #N/A                           | #N/A                          | 7.13 ± 0.46                      |
| <i>EV + Tunicamycin</i> | #N/A                          | #N/A                           | 7.15 ± 0.63                   | #N/A                             |
| <i>Y17G9B.5</i>         | 1.4 ± 0.11                    | 1.07 ± 0.05                    | 0.92 ± 0.05                   | 0.84 ± 0.04                      |
| <i>his-5</i>            | 2.27 ± 0.14                   | 0.96 ± 0.03                    | 1.18 ± 0.07                   | 0.09 ± 0.01                      |
| <i>tkt-1</i>            | 2.42 ± 0.28                   | 0.76 ± 0.02                    | 0.98 ± 0.05                   | 0.57 ± 0.02                      |
| <i>ant-1.1</i>          | 2.46 ± 0.33                   | 0.86 ± 0.03                    | 0.72 ± 0.04                   | 0.83 ± 0.03                      |
| <i>F21C3.10</i>         | 2.56 ± 0.2                    | 1.02 ± 0.05                    | 1.09 ± 0.06                   | 0.94 ± 0.06                      |
| <i>drp-1</i>            | 2.96 ± 0.39                   | 0.92 ± 0.04                    | 0.78 ± 0.03                   | 1.02 ± 0.06                      |
| <i>C04C3.3</i>          | 3.19 ± 0.35                   | 1.07 ± 0.05                    | 1.19 ± 0.06                   | 0.87 ± 0.04                      |
| <i>Y24D9A.8</i>         | 3.49 ± 0.25                   | 0.75 ± 0.04                    | 0.91 ± 0.08                   | 0.55 ± 0.02                      |
| <i>W02B12.9</i>         | 3.58 ± 0.34                   | 1.01 ± 0.03                    | 1.16 ± 0.12                   | 0.81 ± 0.05                      |
| <i>sco-1</i>            | 3.87 ± 0.59                   | 1.16 ± 0.04                    | 0.84 ± 0.09                   | 0.92 ± 0.05                      |
| <i>C08F8.2</i>          | 5.08 ± 0.72                   | 1.06 ± 0.05                    | 0.9 ± 0.03                    | 0.87 ± 0.05                      |
| <i>Y52B11C.1</i>        | 5.35 ± 0.39                   | 1.35 ± 0.05                    | 0.95 ± 0.06                   | 1.1 ± 0.05                       |
| <i>F15D3.6</i>          | 6.03 ± 0.35                   | 1.36 ± 0.07                    | 0.82 ± 0.03                   | 0.86 ± 0.05                      |
| <i>cchl-1</i>           | 8.2 ± 1.04                    | 1.42 ± 0.04                    | 0.84 ± 0.04                   | 1.01 ± 0.04                      |
| <i>ech-6</i>            | 8.97 ± 1.37                   | 1.45 ± 0.06                    | 0.93 ± 0.04                   | 0.93 ± 0.04                      |
| <i>hsp-60</i>           | 11.14 ± 0.78                  | 1.01 ± 0.03                    | 1.09 ± 0.04                   | 0.59 ± 0.03                      |
| <i>F02A9.4</i>          | 11.17 ± 0.96                  | 1.33 ± 0.06                    | 0.87 ± 0.07                   | 0.79 ± 0.03                      |
| <i>AC8.6</i>            | 11.62 ± 1                     | 1.28 ± 0.06                    | 0.76 ± 0.04                   | 1 ± 0.04                         |
| <i>tomm-22</i>          | 11.93 ± 0.81                  | 1.14 ± 0.05                    | 1.19 ± 0.11                   | 0.65 ± 0.04                      |
| <i>T09B4.9</i>          | 12.04 ± 0.73                  | 1.65 ± 0.14                    | 1.02 ± 0.04                   | 0.7 ± 0.03                       |
| <i>Y38E10A.24</i>       | 12.16 ± 0.67                  | 1.07 ± 0.05                    | 1.44 ± 0.08                   | 0.72 ± 0.02                      |
| <i>Y22D7AL.10</i>       | 12.85 ± 0.71                  | 0.93 ± 0.03                    | 0.76 ± 0.06                   | 0.84 ± 0.04                      |
| <i>wah-1</i>            | 13.17 ± 1.99                  | 1.36 ± 0.04                    | 1.14 ± 0.04                   | 0.93 ± 0.06                      |
| <i>E04A4.5</i>          | 13.33 ± 1.12                  | 1.4 ± 0.11                     | 0.97 ± 0.09                   | 0.64 ± 0.02                      |
| <i>Y54G9A.7</i>         | 14.04 ± 1.31                  | 1.28 ± 0.05                    | 1.14 ± 0.08                   | 0.92 ± 0.06                      |
| <i>Y110A7A.19</i>       | 14.41 ± 1.3                   | 1.45 ± 0.08                    | 0.84 ± 0.05                   | 0.77 ± 0.03                      |
| <i>ril-1</i>            | 14.71 ± 2.81                  | 1.05 ± 0.06                    | 0.59 ± 0.04                   | 0.35 ± 0.02                      |
| <i>letm-1</i>           | 16.06 ± 2.44                  | 1.22 ± 0.05                    | 0.83 ± 0.03                   | 0.73 ± 0.03                      |
| <i>phb-2</i>            | 16.11 ± 2.36                  | 1.99 ± 0.11                    | 1.2 ± 0.06                    | 0.55 ± 0.03                      |
| <i>lpd-9</i>            | 16.37 ± 1.45                  | 1.46 ± 0.07                    | 1.15 ± 0.08                   | 0.97 ± 0.05                      |
| <i>W02F12.5</i>         | 16.47 ± 1.73                  | 1.15 ± 0.06                    | 1.1 ± 0.07                    | 0.73 ± 0.03                      |
| <i>F45G2.8</i>          | 16.95 ± 1.4                   | 1.37 ± 0.05                    | 1.07 ± 0.09                   | 0.81 ± 0.04                      |
| <i>F15D3.7</i>          | 17.52 ± 1.13                  | 1.67 ± 0.08                    | 0.93 ± 0.06                   | 0.61 ± 0.04                      |
| <i>dnj-21</i>           | 22.12 ± 2.48                  | 1.93 ± 0.1                     | 1.19 ± 0.08                   | 0.87 ± 0.04                      |

RNAi knockdown of the shown genes significantly induced expression of the *hsp-6<sub>p</sub>::gfp* reporter. The effect on mean GFP fluorescence from each RNAi clone is shown relative to empty vector (EV) treated animals (± SEM, N=3). Worms were grown at 20°C and

imaged 3 days from hatching. Gene knockdowns that significantly increased (student's t-test with Bonferroni correction) each reporter are highlighted in gray.

**Supplementary Table 4. Primers used for qRT-PCR.** qRT-PCR was used to measure expression of mitoUPR targets.

| <b>Primer</b>        | <b>Sequence</b>      |
|----------------------|----------------------|
| hsp-6 <sub>F</sub>   | TCGTGAACGTTTCAGCCAGA |
| hsp-6 <sub>R</sub>   | CTCAGCGGCATTCTTTTCGG |
| hsp-60 <sub>F</sub>  | GGGGAAGCCCAAAGATCACA |
| hsp-60 <sub>R</sub>  | TCCAGCCTCCTCATTAGCCT |
| timm-23 <sub>F</sub> | CTCCGATCGATCTCAGTGCC |
| timm-23 <sub>R</sub> | ATAGGGTGTCATTTGCCGGG |

## SUPPLEMENTARY REFERENCES

- 1) Li, J., Cai, T., Wu, P., Cui, Z., Chen, X., Hou, J., Xie, Z., Xue, P., Shi, L., Liu, P., *et al.* (2009). Proteomic analysis of mitochondria from *Caenorhabditis elegans*. *Proteomics* 9, 4539-4553.
- 2) Chen, D., Pan, K.Z., Palter, J.E., and Kapahi, P. (2007). Longevity determined by developmental arrest genes in *Caenorhabditis elegans*. *Aging Cell* 6, 525-533.
- 3) Yoneda, T. et al. Compartment-specific perturbation of protein handling activates genes encoding mitochondrial chaperones. *J Cell Sci* 117, 4055-4066, doi:10.1242/jcs.01275 (2004).
- 4) Nargund, A. M., Pellegrino, M. W., Fiorese, C. J., Baker, B. M. & Haynes, C. M. Mitochondrial import efficiency of ATFS-1 regulates mitochondrial UPR activation. *Science* 337, 587-590, doi:10.1126/science.1223560 (2012).
- 5) Melo, J.A., and Ruvkun, G. Inactivation of Conserved *C. elegans* Genes Engages Pathogen- and Xenobiotic-Associated Defenses. *Cell* 149, 452–466 (2012).
- 6) Shore, D.E., Carr, C.E., and Ruvkun, G. Induction of Cytoprotective Pathways Is Central to the Extension of Lifespan Conferred by Multiple Longevity Pathways. *PLoS Genet* 8, e1002792 (2012).
- 7) Houtkooper, R. H. et al. Mitonuclear protein imbalance as a conserved longevity mechanism. *Nature* 497, 451-457, doi:10.1038/nature12188 (2013).
- 8) Lee, S. S. et al. A systematic RNAi screen identifies a critical role for mitochondria in *C. elegans* longevity. *Nat Genet* 33, 40-48, doi:10.1038/ng1056 (2003).
- 9) Hamilton, B. et al. A systematic RNAi screen for longevity genes in *C. elegans*. *Genes Dev* 19, 1544-1555 (2005).
